# Supplementary material for: Effects of Once-Weekly Semaglutide on Cardiovascular Risk Factors and Metabolic Dysfunction-Associated Steatotic Liver Disease in Japanese Patients with Type 2 Diabetes: A Retrospective Longitudinal Study Based on Real-World Data
Source: MDPI journal article supplement (doi:10.3390/biomedicines12051001), 2024-05-02
Supplement: s1 [file s1]

**Table S1.** The changes in metabolic parameters during the semaglutide treatment in patients who were GLP-1RA naïve or given semaglutide after being switched from other GLP-1RAs.

(a) The changes in metabolic parameters 3 months after the initiation of semaglutide treatment.

|                                    | Group A |                      |             |          | Group B |                                   |             |          |
|------------------------------------|---------|----------------------|-------------|----------|---------|-----------------------------------|-------------|----------|
|                                    |         | GLP-1RA naïve (n=36) |             |          |         | Switch from other GLP-1RAs (n=39) |             |          |
|                                    | n       | Baseline             | 3 months    | <i>p</i> | n       | Baseline                          | 3 months    | <i>p</i> |
| Body weight (kg)                   | 31      | 90.6 ± 17.3          | 88.4 ± 16.6 | 0.019    | 33      | 78.9 ± 10.9                       | 78.2 ± 11.5 | 0.086    |
| BMI (kg/m <sup>2</sup> )           | 31      | 33.7 ± 5.2           | 32.9 ± 5.2  | 0.020    | 33      | 29.4 ± 4.2                        | 29.1 ± 4.1  | 0.051    |
| Systolic blood pressure (mmHg)     | 32      | 135 ± 15             | 130 ± 14    | 0.162    | 33      | 132 ± 12                          | 129 ± 14    | 0.292    |
| Diastolic blood pressure (mmHg)    | 32      | 80 ± 10              | 81 ± 12     | 0.557    | 33      | 78 ± 13                           | 77 ± 12     | 0.637    |
| Plasma glucose (mg/dL)             | 34      | 181 ± 65             | 155 ± 47    | < 0.001  | 39      | 166 ± 46                          | 171 ± 50    | 0.635    |
| HbA1c (%)                          | 34      | 8.3 ± 1.4            | 7.4 ± 1.0   | < 0.001  | 39      | 8.1 ± 1.2                         | 7.6 ± 0.9   | 0.001    |
| Alb (g/dL)                         | 33      | 4.10 ± 0.53          | 4.16 ± 0.41 | 0.243    | 35      | 4.14 ± 0.57                       | 4.21 ± 0.46 | 0.228    |
| AST (IU/L)                         | 36      | 40 ± 26              | 28 ± 12     | < 0.001  | 39      | 35 ± 33                           | 31 ± 25     | 0.404    |
| ALT (IU/L)                         | 36      | 54 ± 38              | 38 ± 23     | < 0.001  | 39      | 43 ± 36                           | 40 ± 36     | 0.244    |
| gGTP (IU/L)                        | 34      | 66 ± 61              | 51 ± 44     | < 0.001  | 38      | 57 ± 60                           | 52 ± 71     | 0.152    |
| TC (mg/dL)                         | 33      | 190 ± 45             | 166 ± 28    | < 0.001  | 36      | 167 ± 29                          | 166 ± 33    | 0.489    |
| HDL-C (mg/dL)                      | 33      | 47 ± 11              | 48 ± 11     | 0.250    | 38      | 45 ± 10                           | 45 ± 11     | 0.349    |
| LDL-C (mg/dL)                      | 27      | 101 ± 29             | 87 ± 25     | 0.004    | 35      | 90 ± 25                           | 89 ± 24     | 0.823    |
| TG (mg/dL)                         | 32      | 222 ± 136            | 178 ± 85    | 0.014    | 38      | 227 ± 159                         | 227 ± 164   | 0.520    |
| TG / HDL-C                         | 33      | 5.1 ± 3.4            | 3.9 ± 2.2   | 0.013    | 38      | 5.7 ± 4.9                         | 6.1 ± 6.5   | 0.348    |
| Non-HDL-C (mg/dL)                  | 34      | 140 ± 44             | 118 ± 27    | < 0.001  | 36      | 121 ± 29                          | 121 ± 34    | 0.421    |
| Creatinine (mg/dL)                 | 36      | 0.83 ± 0.34          | 0.88 ± 0.70 | 0.655    | 39      | 0.78 ± 0.31                       | 0.79 ± 0.29 | 0.170    |
| eGFR (mL/min/1.73 m <sup>2</sup> ) | 36      | 74 ± 22              | 76 ± 25     | 0.179    | 39      | 84 ± 36                           | 81 ± 33     | 0.142    |
| Uric acid (mg/dL)                  | 30      | 5.6 ± 1.6            | 5.3 ± 1.8   | 0.150    | 36      | 5.9 ± 1.5                         | 5.8 ± 1.5   | 0.640    |
| Hemoglobin (g/dL)                  | 36      | 14.5 ± 1.7           | 14.4 ± 1.4  | 0.494    | 39      | 14.6 ± 1.8                        | 14.7 ± 1.7  | 0.514    |
| Platelet (× 10 <sup>4</sup> /μL)   | 36      | 24.8 ± 7.6           | 25.3 ± 7.8  | 0.254    | 39      | 23.4 ± 6.7                        | 24.2 ± 8.1  | 0.207    |
| UACR (mg/g Cre)                    | 15      | 210 ± 402            | 145 ± 266   | 0.307    | 23      | 131 ± 186                         | 94 ± 185    | 0.236    |

(b) The changes in metabolic parameters 6 months after the initiation of semaglutide treatment.

|                                 | GLP-1RA naïve (n=29) |             |             |          | Switch from other GLP-1RAs (n=25) |             |             |          |
|---------------------------------|----------------------|-------------|-------------|----------|-----------------------------------|-------------|-------------|----------|
|                                 |                      | Baseline    | 6 months    | <i>p</i> |                                   | Baseline    | 6 months    | <i>p</i> |
| Body weight (kg)                | 26                   | 89.4 ± 18.3 | 86.8 ± 18.1 | 0.035    | 24                                | 78.8 ± 11.0 | 78.0 ± 11.1 | 0.131    |
| BMI (kg/m <sup>2</sup> )        | 26                   | 33.1 ± 5.3  | 32.1 ± 5.5  | 0.031    | 24                                | 29.6 ± 4.6  | 29.3 ± 4.7  | 0.101    |
| Systolic blood pressure (mmHg)  | 27                   | 134 ± 14    | 133 ± 19    | 0.849    | 24                                | 129 ± 12    | 133 ± 14    | 0.224    |
| Diastolic blood pressure (mmHg) | 27                   | 79 ± 10     | 80 ± 11     | 0.756    | 24                                | 76 ± 9      | 79 ± 10     | 0.298    |
| Plasma glucose (mg/dL)          | 28                   | 189 ± 67    | 150 ± 44    | 0.001    | 25                                | 166 ± 45    | 177 ± 50    | 0.387    |
| HbA1c (%)                       | 28                   | 8.5 ± 1.5   | 7.3 ± 1.0   | < 0.001  | 25                                | 8.2 ± 1.3   | 7.7 ± 0.9   | 0.027    |
| Alb (g/dL)                      | 28                   | 4.12 ± 0.38 | 4.12 ± 0.38 | 1.000    | 20                                | 4.05 ± 0.67 | 4.20 ± 0.50 | 0.187    |
| AST (IU/L)                      | 29                   | 42 ± 27     | 30 ± 13     | 0.003    | 25                                | 33 ± 31     | 32 ± 30     | 0.692    |

|                                    |    |             |             |         |    |             |             |       |
|------------------------------------|----|-------------|-------------|---------|----|-------------|-------------|-------|
| ALT (IU/L)                         | 29 | 56 ± 40     | 38 ± 19     | 0.002   | 25 | 42 ± 31     | 41 ± 36     | 0.202 |
| GGTP (IU/L)                        | 27 | 72 ± 67     | 51 ± 47     | < 0.001 | 24 | 49 ± 51     | 52 ± 79     | 0.537 |
| TC (mg/dL)                         | 27 | 192 ± 48    | 170 ± 28    | 0.038   | 23 | 164 ± 26    | 164 ± 30    | 0.983 |
| HDL-C (mg/dL)                      | 27 | 48 ± 11     | 50 ± 12     | 0.314   | 25 | 44 ± 10     | 45 ± 12     | 0.774 |
| LDL-C (mg/dL)                      | 22 | 101 ± 30    | 91 ± 20     | 0.226   | 24 | 91 ± 26     | 86 ± 20     | 0.229 |
| TG (mg/dL)                         | 27 | 234 ± 149   | 175 ± 96    | 0.005   | 25 | 218 ± 127   | 256 ± 253   | 0.732 |
| TG / HDL-C                         | 27 | 5.3 ± 3.6   | 3.9 ± 2.6   | 0.013   | 25 | 5.7 ± 4.6   | 7.3 ± 9.6   | 0.882 |
| Non-HDL-C (mg/dL)                  | 26 | 142 ± 47    | 121 ± 29    | 0.054   | 23 | 119 ± 28    | 119 ± 34    | 0.975 |
| Creatinine (mg/dL)                 | 29 | 0.84 ± 0.37 | 0.81 ± 0.40 | 0.208   | 25 | 0.80 ± 0.33 | 0.81 ± 0.35 | 0.762 |
| eGFR (mL/min/1.73 m <sup>2</sup> ) | 29 | 74 ± 24     | 78 ± 24     | 0.064   | 25 | 85 ± 41     | 85 ± 41     | 0.929 |
| Uric acid (mg/dL)                  | 24 | 5.8 ± 1.76  | 5.3 ± 2.4   | 0.103   | 23 | 6.0 ± 1.6   | 5.7 ± 1.2   | 0.128 |
| Hemoglobin (g/dL)                  | 29 | 14.6 ± 1.5  | 14.3 ± 1.1  | 0.146   | 25 | 14.3 ± 2.0  | 14.6 ± 1.7  | 0.246 |
| Platelet (× 10 <sup>4</sup> /μL)   | 29 | 23.6 ± 6.9  | 24.4 ± 6.9  | 0.138   | 25 | 23.3 ± 6.6  | 23.4 ± 6.3  | 0.866 |
| UACR (mg/g Cre)                    | 13 | 216 ± 445   | 166 ± 300   | 0.753   | 15 | 97 ± 175    | 99 ± 163    | 0.280 |

Values show mean ± SD. ALT, alanine aminotransferase; AST, aspartate aminotransferase; BMI, body mass index; eGFR, estimated glomerular filtration rate; GGTP, gamma-glutamyl transferase; HbA1c, hemoglobin A1c; HDL-C, high-density lipoprotein cholesterol; LDL-C, low-density lipoprotein cholesterol; TC, total cholesterol; TG, triglyceride; UACR, albumin-to-creatinine ratio.
